# Supplementary material
Source: publisher figshare collection journal article supplement (https://acs.figshare.com/ndownloader/files/15009443)
Supplement: Supplementary file 1 [file 15009443]

**Design and Performance of a Dual-Polarity Instrument for Ion Soft landing**

Pei Su<sup>1</sup>, Hang Hu<sup>1</sup>, Jonas Warneke<sup>1,4</sup>, Mikhail E. Belov<sup>2</sup>, Gordon A. Anderson<sup>3</sup>, Julia Laskin<sup>1</sup>

1. Department of Chemistry, Purdue University, 560 Oval Drive, West Lafayette, Indiana 47907, United States

2. Spectrograph, LLC, Kennewick, Washington 99338, United States

3. GAA Custom Engineering, LLC, Benton City, Washington 99320, United States

4. Wilhelm-Ostwald-Institut für Physikalische und Theoretische Chemie, Universität Leipzig, Linnestr. 2, 04103 Leipzig, Germany

Corresponding author: Julia Laskin, Tel: 765-494-5464, Email: [jlaskin@purdue.edu](mailto:jlaskin@purdue.edu)

Table of Contents:

**Experimental Section**

**Figure S1.** Time-dependence of the ion currents of mass-selected  $\text{Ru}(\text{bpy})_3^{2+}$  and  $\text{WPOM}^{3-}$  in ESI $\times$ 2 or ESI(+/-) modes recorded over one hour time period. Stable currents are typically obtained over many hours of ion deposition.

**Figure S2.** Ion kinetic energy distributions (KEDs) of  $\text{Ru}(\text{bpy})_3^{2+}$  and  $\text{WPOM}^{3-}$  acquired at different voltages applied to the conductance limit ( $V_{\text{cl}}$ ).

**Figure S3.** Visible spectra of Neutral Red (NR) in acidic and basic solutions.

**Figure S4.** Visible spectra of dropcasted acidic and basic NR methanol solutions.

**Figure S5.** Extraction ESI-MS spectra of the layer prepared by co-deposition of  $\text{Ru}(\text{bpy})_3^{2+}/\text{MoPOM}^{3-}$ .

## Experimental Section

### Chemicals

Tris(2,2'-bipyridyl)dichlororuthenium(II) hexahydrate ( $\text{Ru}(\text{bpy})_3 \cdot 6\text{H}_2\text{O}$ , CAS: 50525-27-4), Neutral Red ( $\text{C}_{15}\text{H}_{17}\text{ClN}_4$ , CAS: 553-24-2), sodium phosphotungstate tribasic hydrate ( $\text{Na}_3[\text{PW}_{12}\text{O}_{40}] \cdot x\text{H}_2\text{O}$ , CAS: 12026-98-1), sodium phosphomolybdate hydrate ( $\text{Na}_3[\text{PMo}_{12}\text{O}_{40}] \cdot x\text{H}_2\text{O}$ , CAS: 1313-30-0) and 1H,1H,2H,2H-perfluorodecanethiol (FSAM,  $\text{CF}_3(\text{CF}_2)_7\text{CH}_2\text{CH}_2\text{SH}$ , CAS: 34143-74-3) were purchased from Sigma-Aldrich (St. Louis, MO) and were used to demonstrate the instrument performance.

### FSAM Surface Preparation

An FSAM on a gold surface was prepared as follows: a 10 × 10 mm gold coated silicon wafer (100 nm Au layer and 5 nm Ti adhesion layer, Platypus Technologies, Madison, WI) was ultrasonically washed in methanol, cleaned by a UV Ozone cleaner and immersed in a glass scintillation vial containing a 15 mM solution of FSAM in methanol. The monolayer was allowed to assemble for at least 12 h and then ultrasonically washed for 5 min in methanol. The surface was subsequently rinsed with methanol, dried under nitrogen and mounted on the sample holder in the soft landing chamber.

### Surface Characterization

Infrared reflection absorption spectroscopy (IRRAS) measurements were performed using a Bruker Tensor II FTIR spectrometer (Bruker Optics, Billerica, MA) equipped with a liquid nitrogen cooled mercury-cadmium-telluride (MCT) detector. Surfaces were mounted onto an 80° reflection unit in the chamber of the spectrometer. IRRAS spectra were acquired at a spectral resolution of 4  $\text{cm}^{-1}$  using p-polarized light. Each spectrum was collected by averaging 2000 scans corresponding to a 5-minute acquisition time. The experimental IRRAS plots were processed using water subtraction and baseline-correction options of the OPUS software.

Visible spectroscopy characterization of on the surfaces was performed using

a R600-8-VisNIR reflectance probe connected to a BLK-CXR spectrometer and a SL1 Tungsten-Halogen visible-NIR light source (Stellarnet, Tampa, FL). Visible spectrum of a clean Au-FSAM surface was used as the reference. The spectra were collected using the SpectraWiz software.

Visible spectroscopy characterization of solutions was performed using an QP450-1-XSR optical fiber patch cords connected to USB2000+UV-VIS spectrometer and a DH-2000-DUV-TTL Deuterium Halogen light source (Ocean Optics, Largo, FL). Visible spectrum of methanol was used as the reference. The spectra were collected using the OceanView software.

Extraction ESI-MS analysis of the surface was performed by dissolving the deposited material with 80  $\mu\text{L}$  methanol and analyzed using Q-Exactive HF-X Hybrid Quadrupole-Orbitrap Mass Spectrometer (Thermo Fisher Scientific GmbH, Bremen, Germany). Sample was introduced into the MS inlet by direct infusion from a capillary (50  $\mu\text{m}$  ID, 150  $\mu\text{m}$  OD) at a flow rate of  $\sim 0.5$   $\mu\text{L}/\text{min}$ . Typical mass spectrometer conditions on Q-Exactive were as follows: electrospray voltage:  $\pm 3$  kV, capillary temperature: 250  $^{\circ}\text{C}$ , RF funnel level: 100. Mass spectra were acquired over 150-2000  $m/z$  at 240000 resolution ( $m/z$  400).

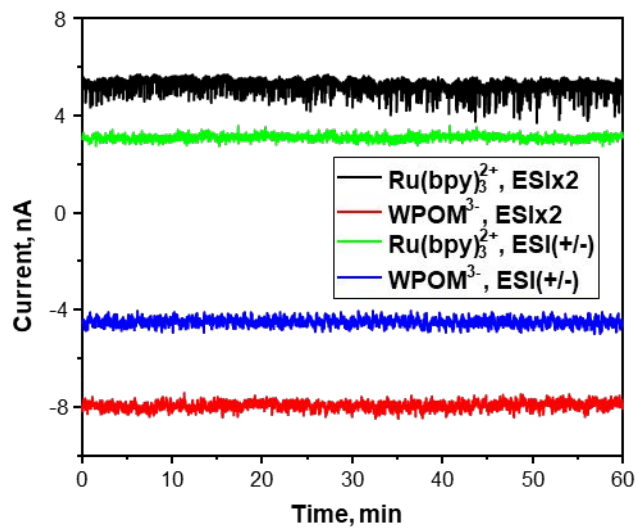

**Figure S1.** Ion current stabilities of mass-selected  $\text{Ru}(\text{bpy})_3^{2+}$  and  $\text{WPOM}^{3-}$  in  $\text{ESI}\times 2$  or  $\text{ESI}(+/-)$  modes over one hour time period.

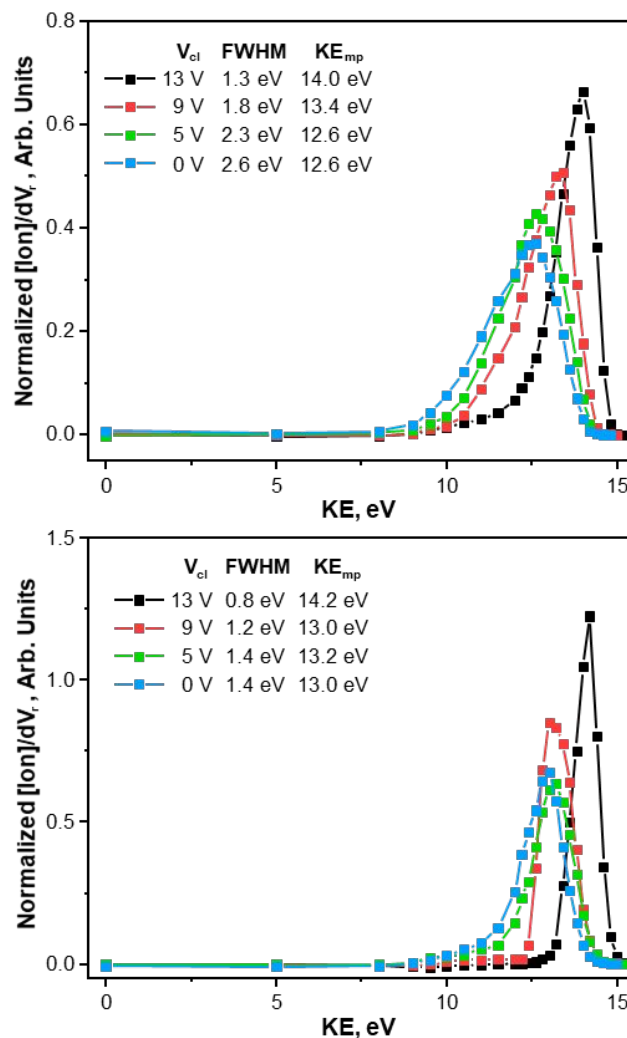

**Figure S2.** Ion kinetic energy distributions (KEDs) of Ru(bpy)<sub>3</sub><sup>2+</sup> (a) and WPOM<sup>3-</sup> (b) acquired at different voltages on the conductance limit ( $V_{cl}$ ). The flatapole bias was kept at +14 V/-14 V for Ru(bpy)<sub>3</sub><sup>2+</sup> and WPOM<sup>3-</sup>, respectively. The FWHM and most probable kinetic energy (KE<sub>mp</sub>) of each KED plot was shown on the top left corner of each figure.

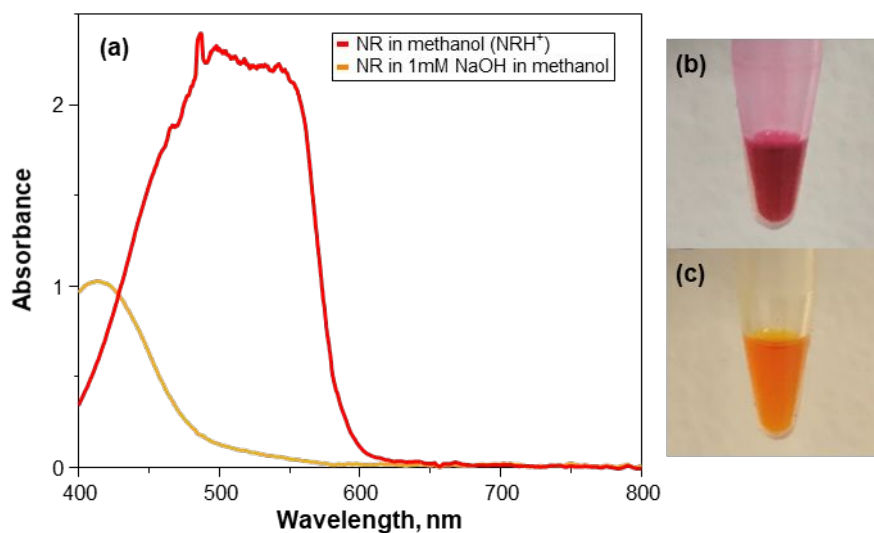

**Figure S3.** (a) Visible spectra of 1 mM Neutral Red in methanol (red) and in a solution of 10 mM NaOH in methanol (yellow). Optical images of the solutions are shown on the right: (b) NR in methanol, (c) NR in 10 mM NaOH in methanol.

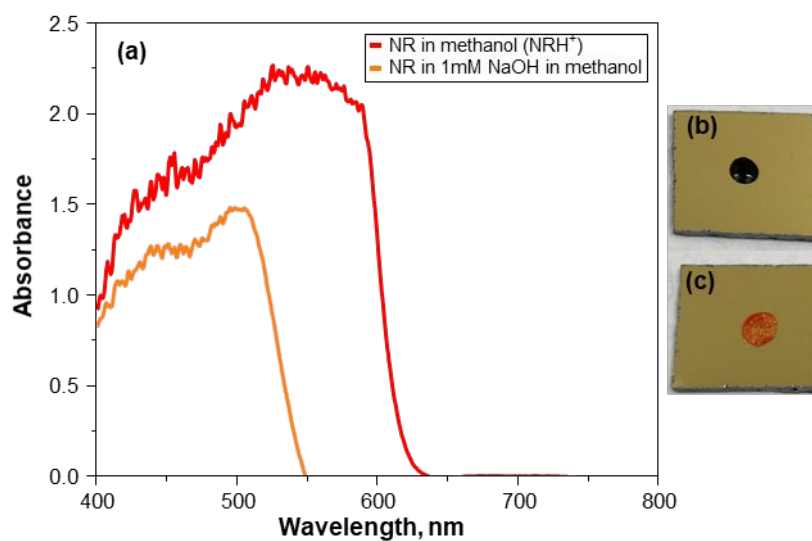

**Figure S4.** (a) Visible spectra of solutions of 1 mM Neutral Red in methanol (red) and in a solution of 10 mM NaOH in methanol (yellow) dropcasted onto FSAM surfaces. Optical images of the dropcasted spots are shown on the right: (b) NR in methanol, (c) NR in 10 mM NaOH in methanol.

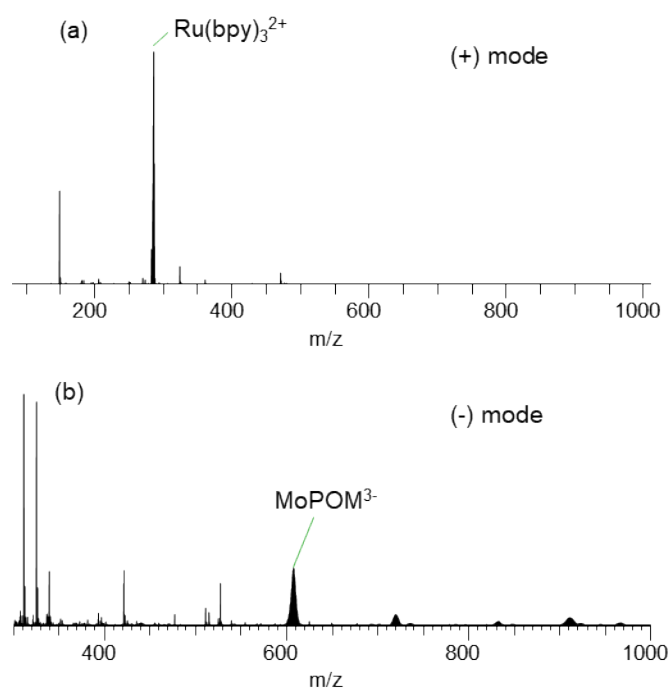

**Figure S5.** Extraction ESI-MS spectra of the layer prepared by co-deposition of  $\text{Ru(bpy)}_3^{2+}/\text{MoPOM}^{3-}$  in positive (a) and negative (b) modes.
